# Supplementary material for: The influence of surface chemistry of activated carbons on adsorption and freezing/melting processes
Source: Royal Society of Chemistry journal article supplement (doi:10.1039/d4cp04562a), 2025-01-01
Supplement: d4cp04562a1.pdf [file d4cp04562a1.pdf]

## Supplementary material for the paper

**Title:** The influence of surface chemistry of activated carbons on adsorption and freezing/melting processes

**Authors:** Alicja Bosacka<sup>1\*</sup>, Małgorzata Zienkiewicz-Strzałka<sup>2</sup>, Anna Deryło-Marczewska<sup>2\*</sup>, Agnieszka Chrzanowska<sup>2</sup>, Małgorzata Wasilewska<sup>2</sup>, Piotr Pikuta<sup>2</sup>

**Affiliation:**

<sup>1</sup>Faculty of Engineering Production, University of Life Sciences, Gleboka 28 Street, 60-612, Lublin, Poland

<sup>2</sup>Faculty of Chemistry, Institute of Chemical Sciences, Maria Curie-Skłodowska University, Maria Curie-Skłodowska Sq. 3, 20-031 Lublin, Poland

**\*Corresponding authors:** alicja.bosacka@up.lublin.pl;anna.derylo-marczewska@mail.umcs.pl

**Table S1.** Physicochemical properties of adsorbates.

| Compound name                                | Phenol (P)                                                                         | 4-Nirophenol (4-NP)                                                                  | Nitrobenzene (NB)                                                                    |
|----------------------------------------------|------------------------------------------------------------------------------------|--------------------------------------------------------------------------------------|--------------------------------------------------------------------------------------|
| Molecular formula                            | C <sub>6</sub> H <sub>6</sub> O                                                    | C <sub>6</sub> H <sub>5</sub> NO <sub>3</sub>                                        | C <sub>6</sub> H <sub>5</sub> NO <sub>2</sub>                                        |
| Chemical formula*                            | 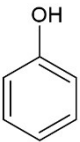 |  |  |
| Molecular weight (g/mol)                     | 94.11                                                                              | 139.11                                                                               | 123.11                                                                               |
| Solubility in water (g/100 mL at 20 °C)      | 8.3                                                                                | 1.6                                                                                  | 0.19                                                                                 |
| Solubility in cyclohexane (g/100 mL at 20°C) | 1.5                                                                                | <0.01                                                                                | 15                                                                                   |
| Ionization constant (pKa)                    | 9.99                                                                               | 7.15                                                                                 | -                                                                                    |
| Melting point (°C)                           | 40.5                                                                               | 113.0                                                                                | 5.7                                                                                  |
| Boiling point (°C)                           | 181.7                                                                              | 210.9                                                                                | 279.0                                                                                |

\*The molecule structures of adsorbate drawn up in ChemSketch/ACDLabs software (Toronto, Canada, USA)

**Table S2.** Physicochemical characteristics of diluents.

| Compound name               | Water (W)                                                                           | Cyclohexane (CH)                                                                      |
|-----------------------------|-------------------------------------------------------------------------------------|---------------------------------------------------------------------------------------|
| Molecular formula           | H <sub>2</sub> O                                                                    | C <sub>6</sub> H <sub>6</sub>                                                         |
| Molecular weight (g/mol)    | 18.02                                                                               | 84.16                                                                                 |
| Density (g/mL at 20 °C)     | 0.9982                                                                              | 0.7785                                                                                |
| Polarity                    | Polar                                                                               | Unpolar                                                                               |
| Dielectric constant (20 °C) | 80.1                                                                                | 2.02                                                                                  |
| Dipole moment (D)           | 1.84                                                                                | 0.00                                                                                  |
| Melting point (°C)          | 0                                                                                   | 6.5                                                                                   |
| Boiling point (°C)          | 100                                                                                 | 80.7                                                                                  |
| Chemical formula*           | 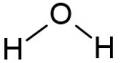 |  |

\*The molecule structures of diluents drawn up in ChemSketch/ACDLabs software (Toronto, Canada, USA)

## Equations:

*First-Order Equation and Pseudo-First-Order Equation (FOE and PFOE)*

$$\ln(c_{eq} - c) = \ln(c_{eq} - c_o) - k_1 t_{or} \ln(a_{eq} - a) = \ln a_{eq} - k_1 t \quad (S1)$$

where  $c$  is the temporary concentration,  $a$  is the actual adsorbed amount, the  $o$  and  $eq$  subscripts are connected to the initial and equilibrium states,  $k_l$  is the adsorption rate coefficient

*Second-Order Equation and Pseudo-Second-Order Equation (SOE and PSOE)*

$$a = a_{eq} [k_2 t / (1 + k_2 t)] \quad (S2)$$
$$or \ t/a = (1/a_{eq})(1/k_2 + t) \text{ and } a = a_{eq} [k_2 t / (1 + k_2 t)]$$

where  $k_2 = k_{2a} \cdot a_{eq}$  and  $k_{2a}$  are the rate coefficients for pseudo-second-order kinetics<sup>17,18</sup>

*1,2-Mixed-Order Equation (MOE)*

$$F = a/a_{eq} = \frac{1 - \exp(-k_1 t)}{1 - f_2 \exp(-k_1 t)} \text{ or } \ln\left(\frac{1 - F}{1 - f_2 F}\right) = -k_1 t \quad (S3)$$

where  $F$  is the relative adsorption progress in time,  $f_2 < 1$  is the normalized share of the second-order process in the kinetics. In special cases, the MOE equation may be degraded to the simple kinetic equations of the first ( $f_2=0$ ) and the second-order ( $f_2=1$ ) type

*Fractal-Like MOE Equation (f-MOE)*

$$F = \frac{1 - \exp(-k_1 t)^p}{1 - f_2 \exp(-k_1 t)^p} \quad (S4)$$

*Multi-Exponential Equation (m-exp)*

$$c = (c_o - c_{eq}) \sum_{i=1}^n f_i \exp(-k_i t) + c_{eq} \quad or \quad c = c_o - c_o u_{eq} \sum_{i=1}^n f_i [1 - \exp(-k_i t)] \quad (S5)$$

where  $i$  is the term of the m-exp equation,  $k_i$  is the rate coefficient and  $u_{eq}=1-c_{eq}/c_o$  is the relative loss of adsorbate from the solution

*Intraparticle Diffusion Model (IDM, Crank)*

$$F = 1 - \frac{6}{\pi^2} \sum_{n=1}^{\infty} \frac{1}{n^2} \exp\left(\frac{-\pi^2 \cdot n^2 \cdot D_a \cdot t}{r^2}\right) \quad (S6)$$

where  $r$  is the radius of the adsorbent particle,  $D_a$  is the effective diffusion coefficient:

$$D_a = \frac{D}{\tau_p \cdot (1 + \rho \cdot K_H \cdot \varepsilon_p)} \quad (S7)$$

where  $D$  is the molecular diffusion coefficient,  $\tau_p$  – the dimensionless pore tortuosity factor,  $\rho$  is the particle density,  $\varepsilon_p$  is the particle porosity,  $K_H$  – the Henry adsorption constant

*Pore Diffusion Model (PDM, McKay)*

$$\frac{dF}{d\tau_s} = \frac{3(1 - u_{eq} \cdot F) \cdot (1 - F)^{\frac{1}{3}}}{1 - B \cdot (1 - F)^{\frac{1}{3}}} \quad (S8)$$

where  $u_{eq}$  is the relative adsorbate loss, the parameter  $B = 1 - 1/B_i$ , where  $B_i = K_f/D_p$  is the Biot number,  $D_p$  is the pore diffusion coefficient,  $K_f$  is the external mass transfer coefficient,  $\tau_s$  is the undersized model time:

$$\tau_s = \frac{1}{6 \cdot u_{eq}} \left\{ \left(2B - \frac{1}{b}\right) \cdot \ln \left[ \frac{x^3 + X^3}{1 + X^3} \right] + \frac{3}{a} \ln \left[ \frac{x + X}{1 + X} \right] \right\} + \left\{ \arctan \left( \frac{2 - X}{X \cdot \sqrt{3}} \right) \right\} - \arctan \left( \frac{2 \cdot x - X}{X \cdot \sqrt{3}} \right) \quad (S9)$$

$$\text{where } x = (1 - F)^{\frac{1}{3}}, b = \left( \frac{1}{1 - u_{eq}} \right)^{\frac{1}{3}}$$

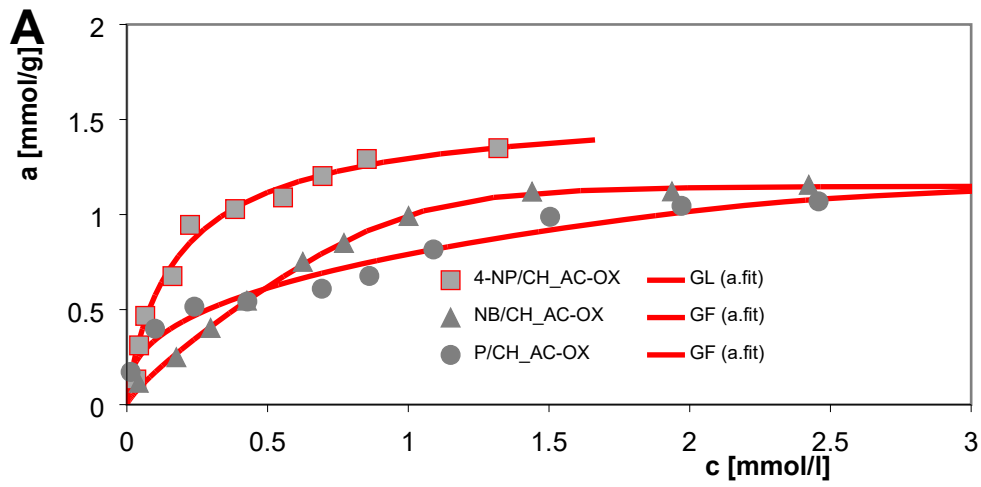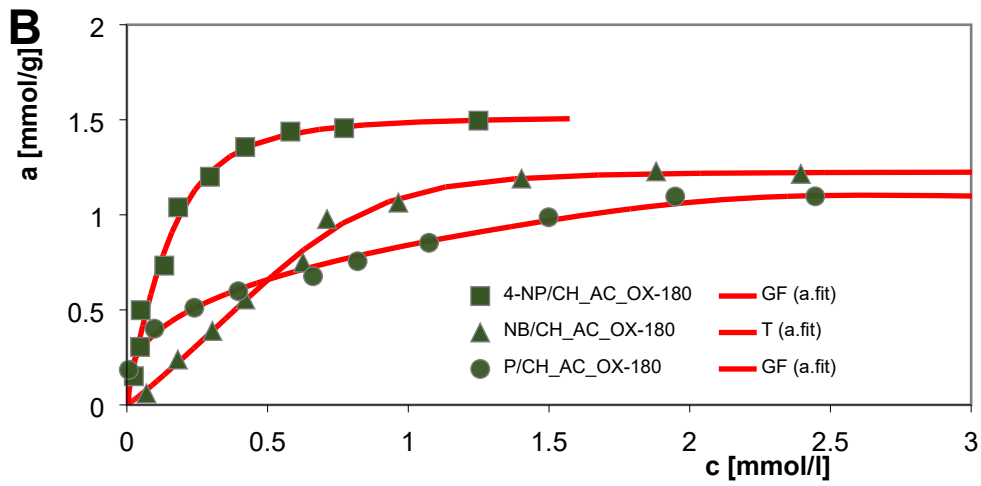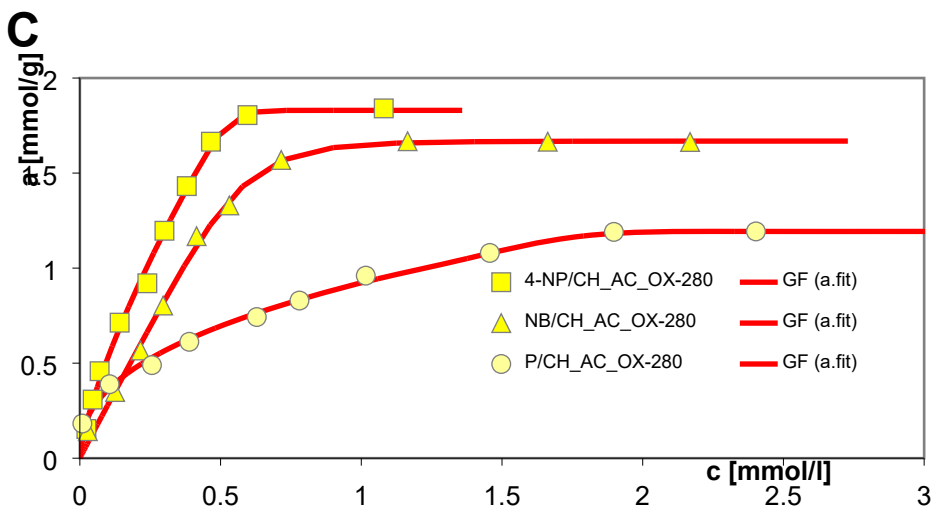

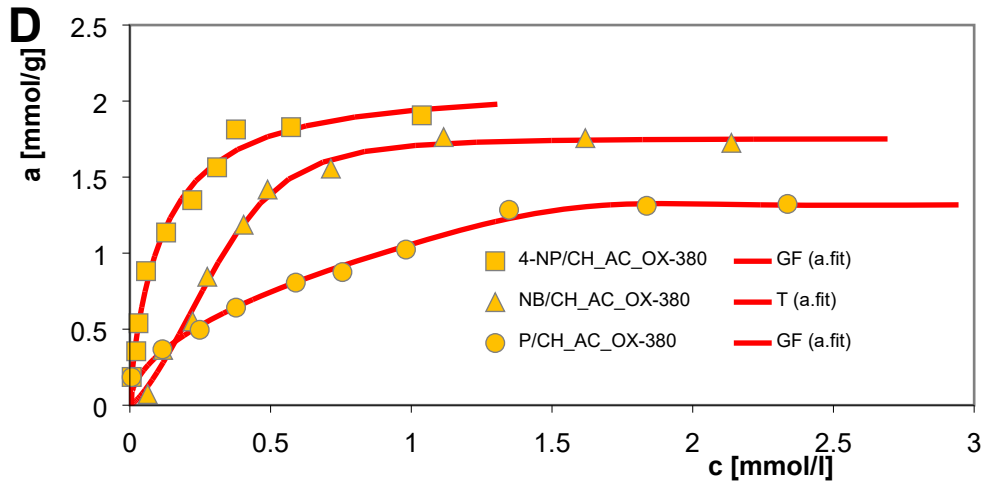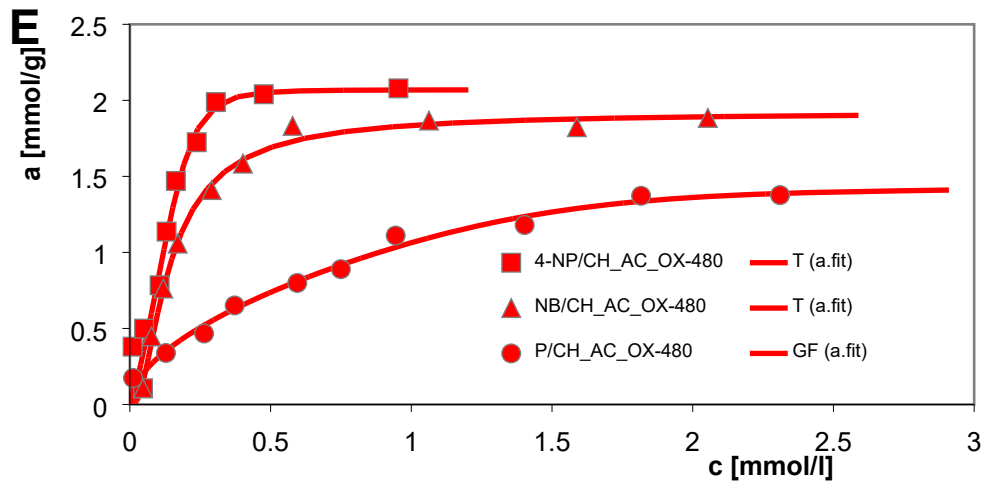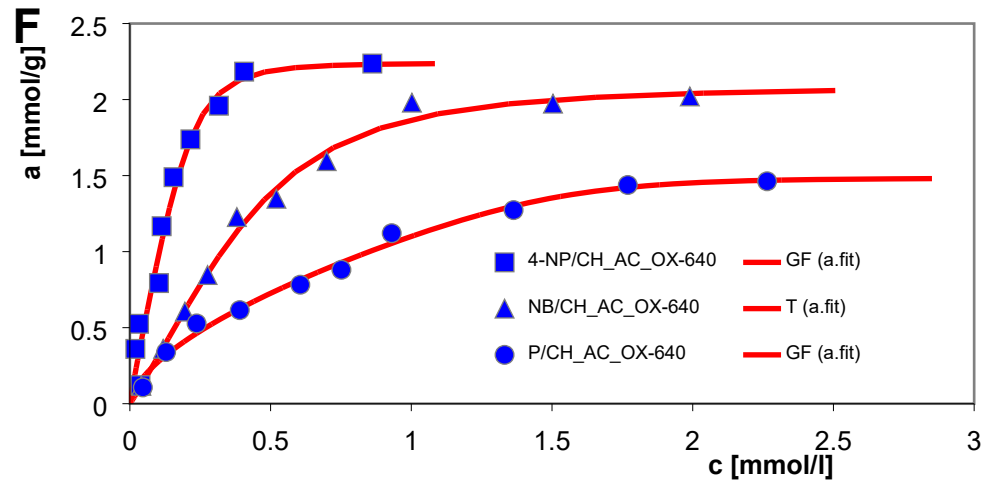

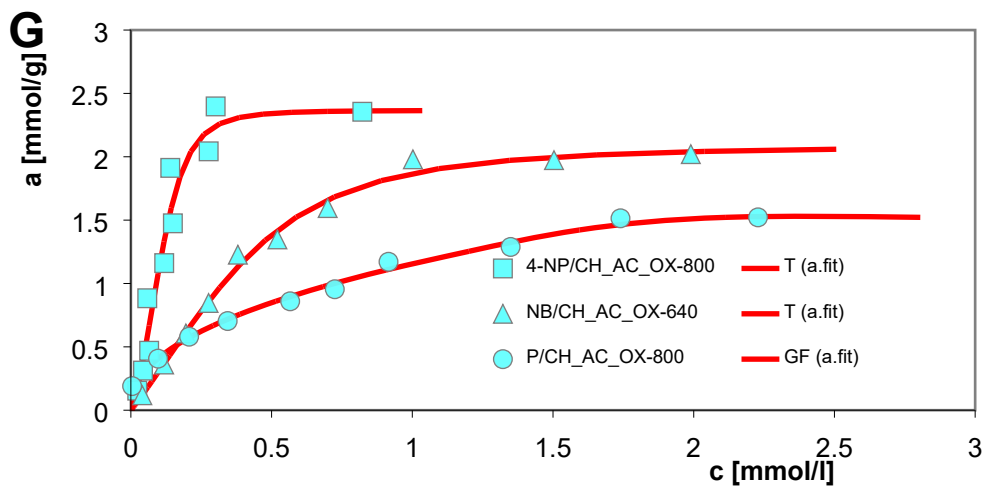

**Figure S1.** The isotherms of 4-NP, NB, and P adsorption from cyclohexane solutions on AC-OX (A), AC-OX-180 (B), AC-OX-280 (C), AC-OX-380 (D), AC-OX-480 (E), AC-OX-640 (F), and AC-OX-800 (G).

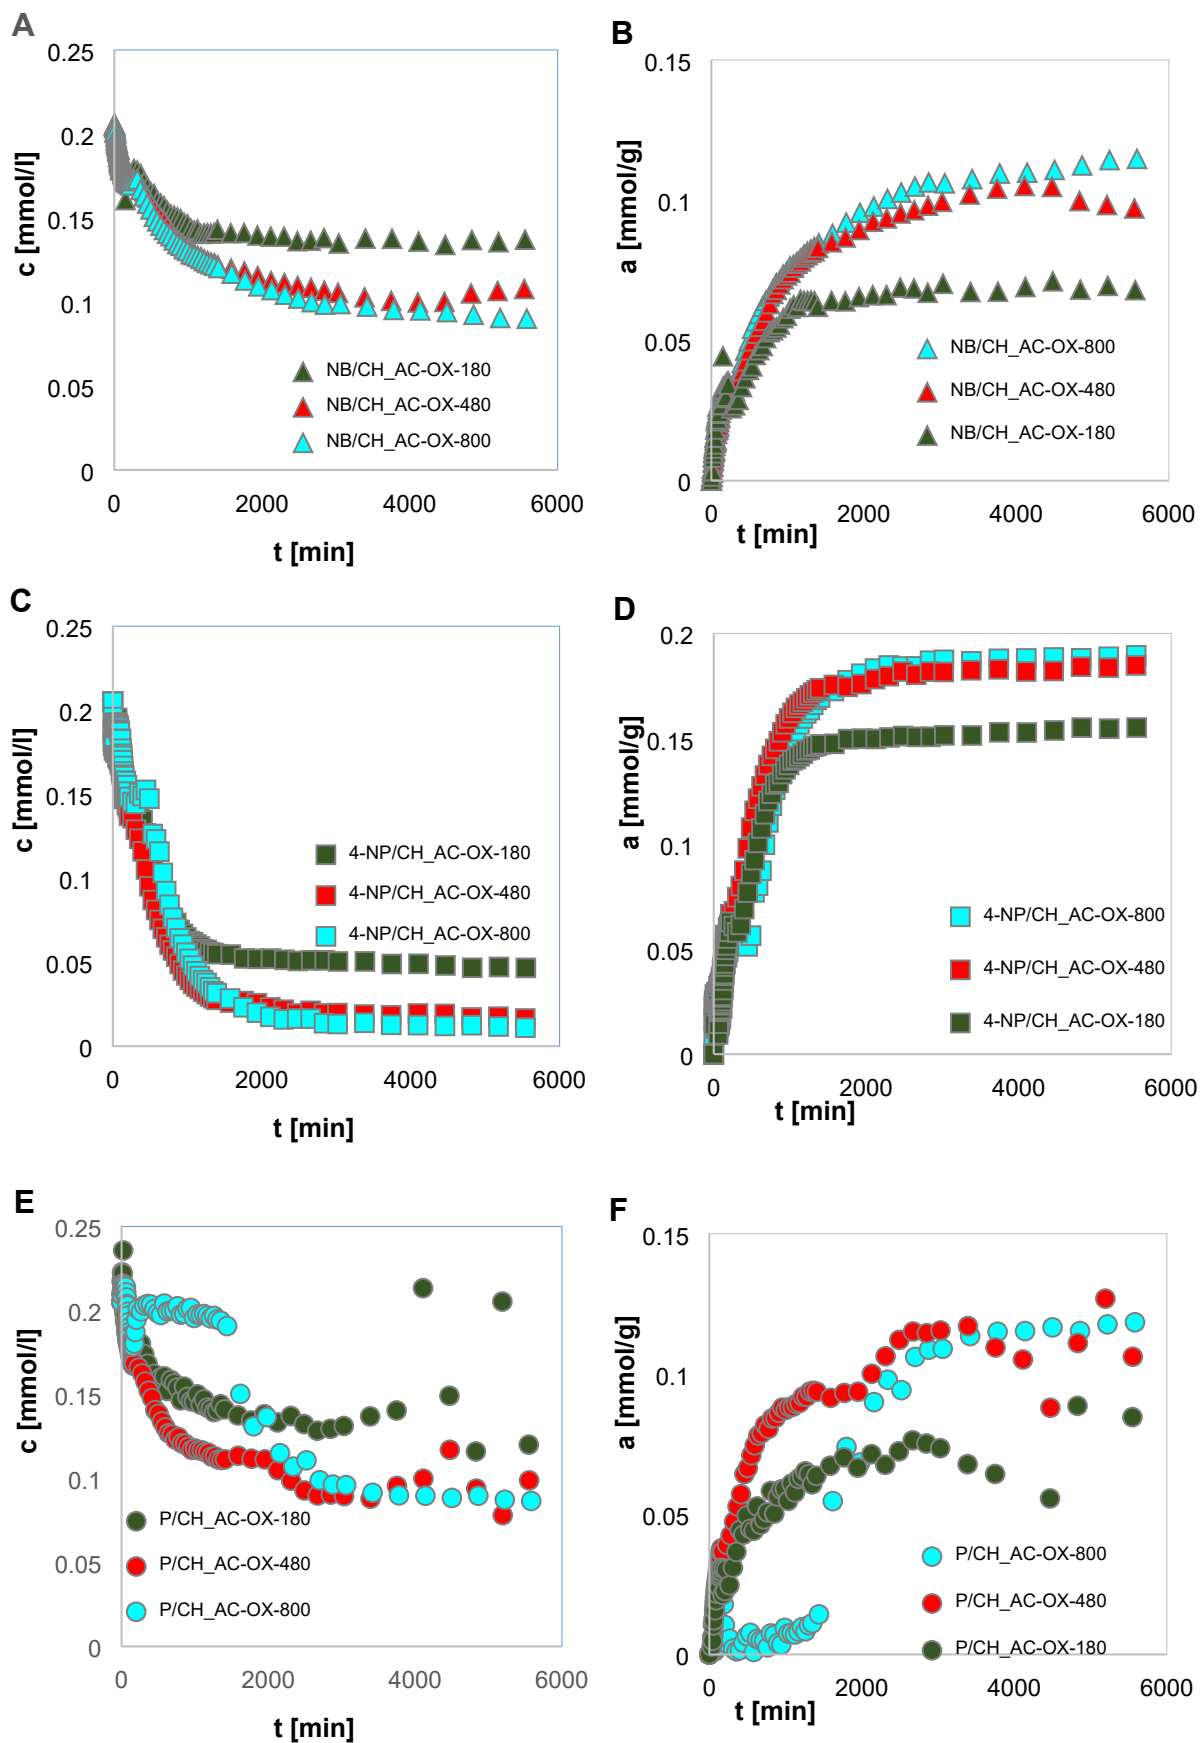

**Figure S2.** Adsorption kinetics for NB (A-B), 4-NP (C-D), and P (E-F) on AC-OX-180, AC-OX-480, and AC-OX-800 presented as changes in concentration over time (A, C, E) and changes in adsorption over time (B, D, F).

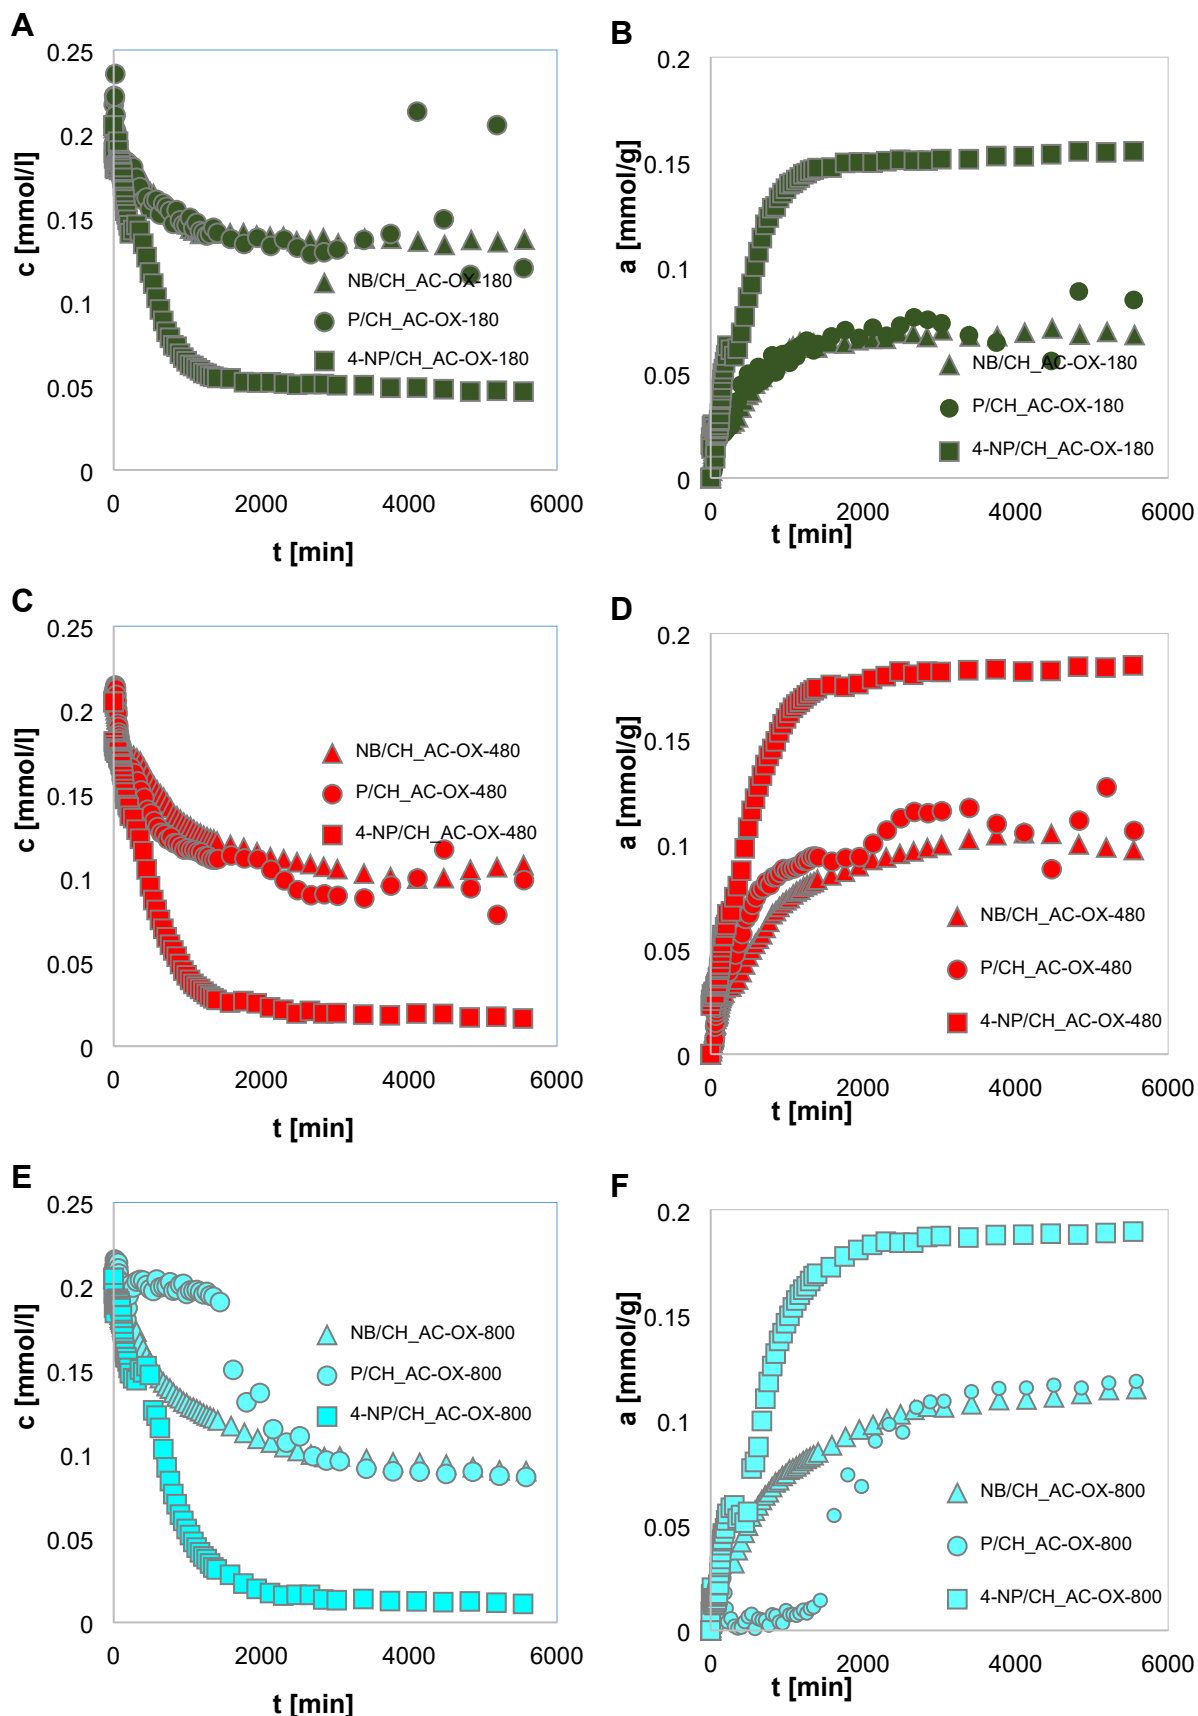

**Figure S3.** Adsorption kinetics for NB, 4-NP and P on AC-OX-180 (A-B), AC-OX-480 (C-D) and AC-OX-800 (E-F) presented as changes in concentration over time (A, C, E) and changes in adsorption over time (B, D, F).

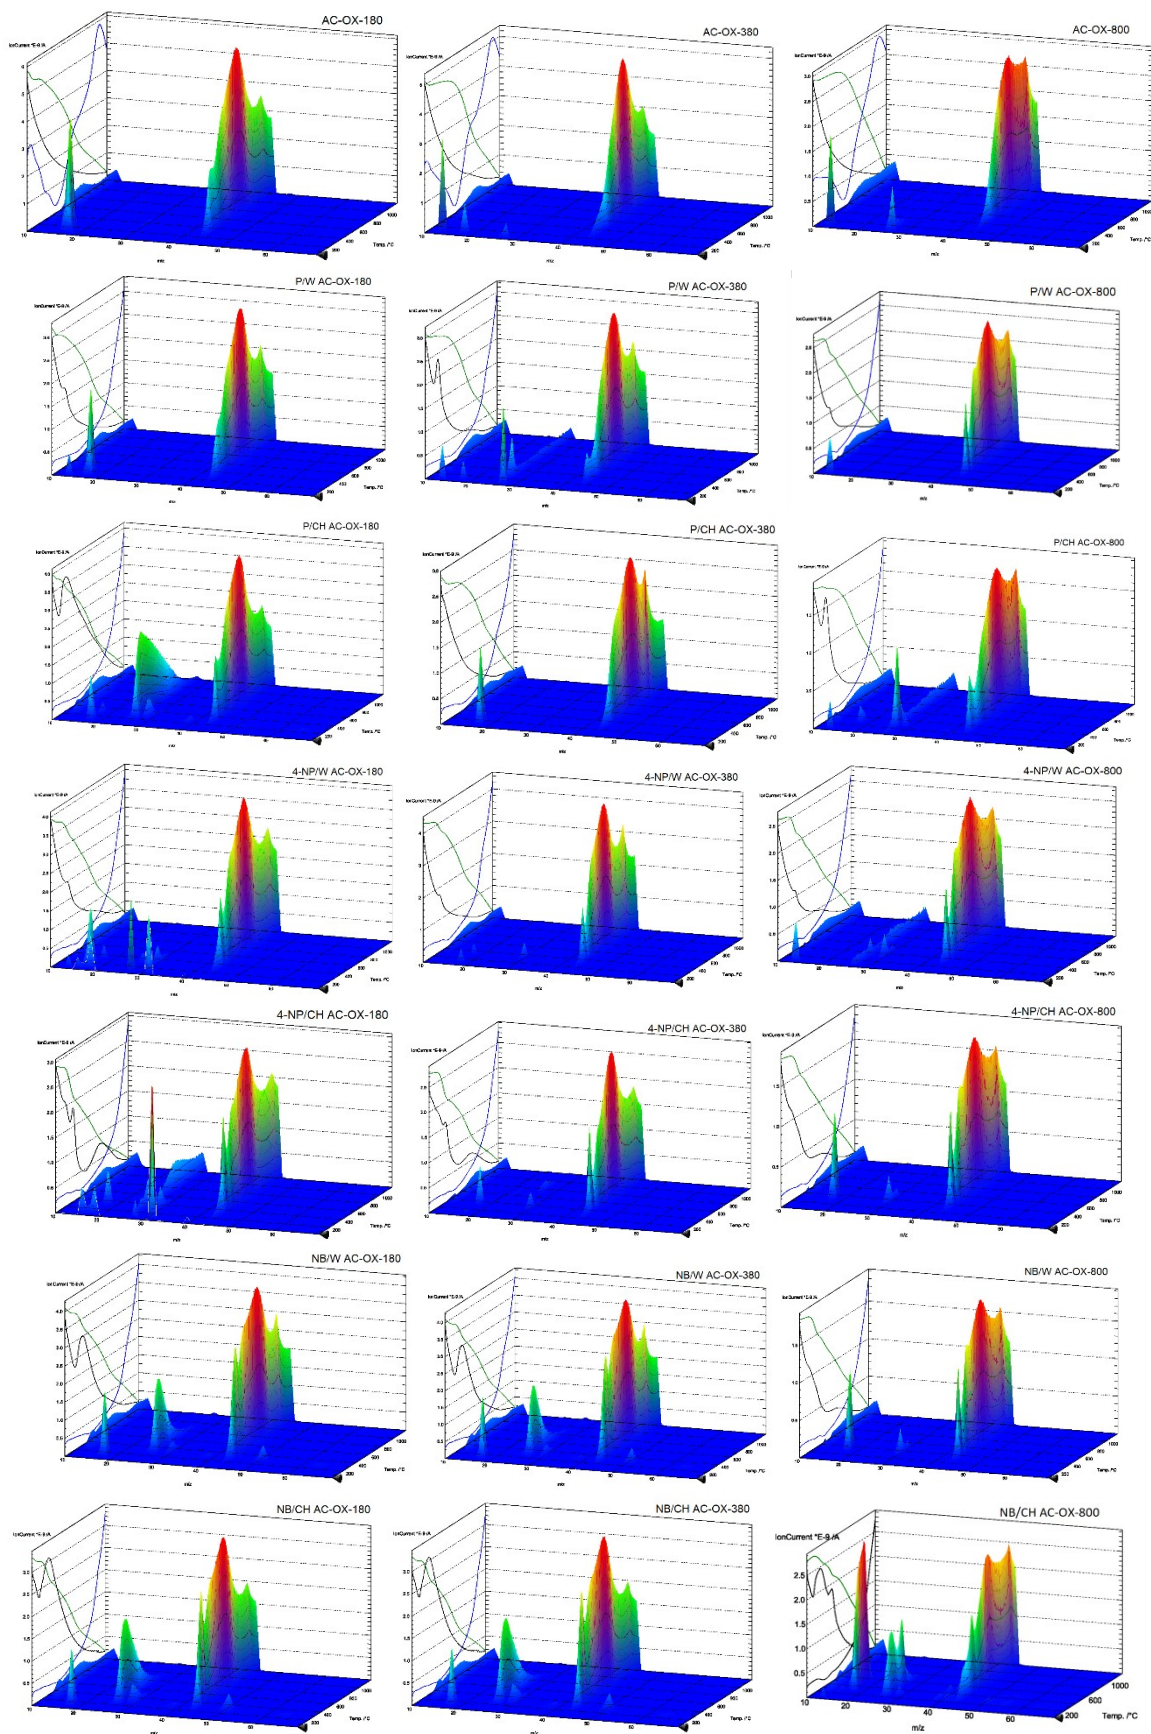

Figure S4. 3D MS profiles of decomposition of AC-OX-180, AC-OX-380 and AC-OX-800 samples.



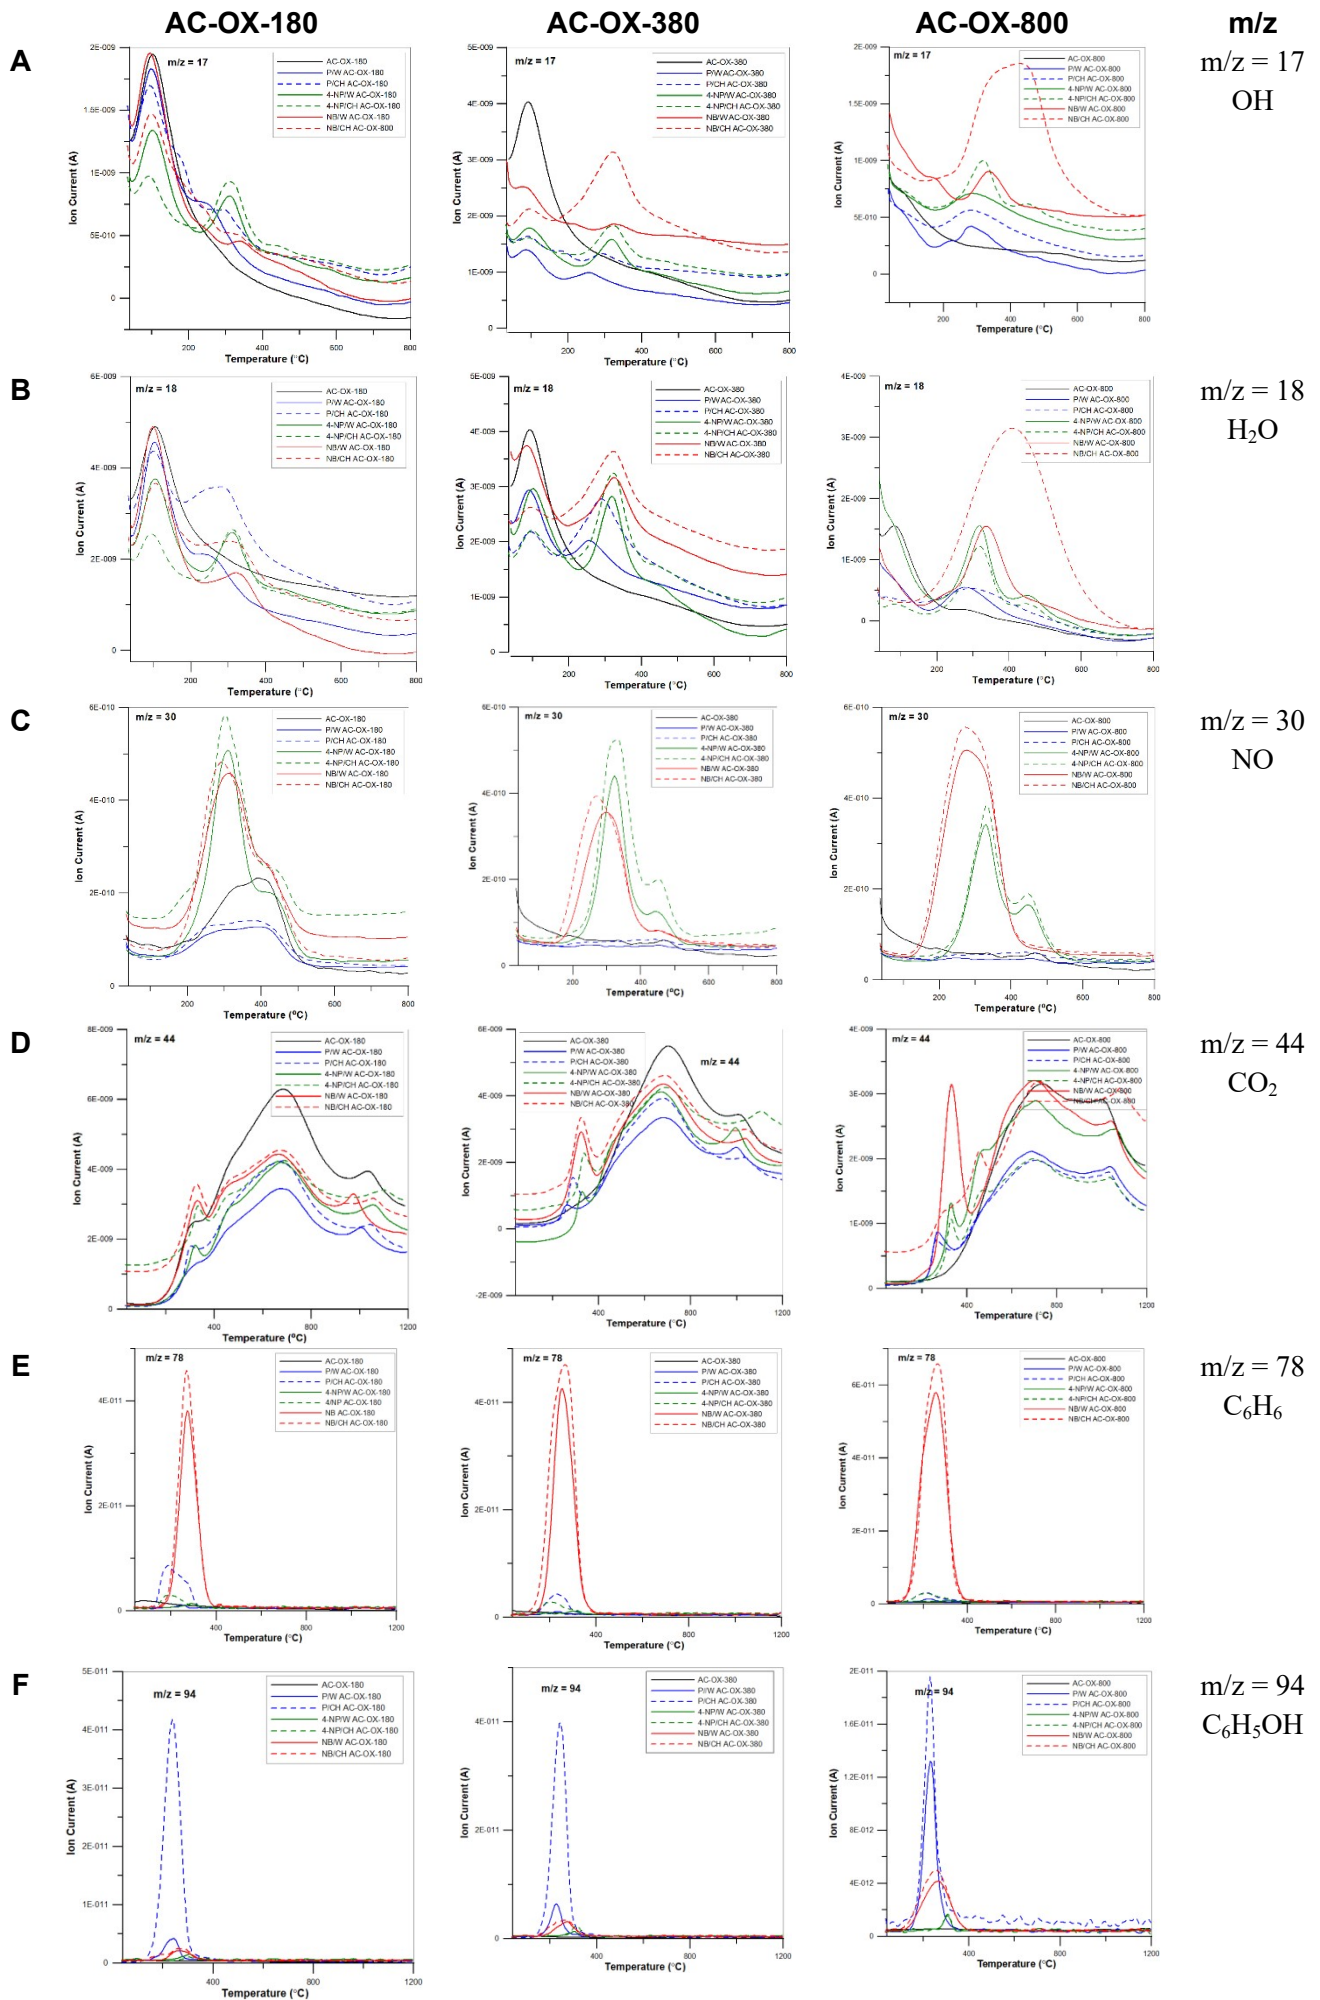

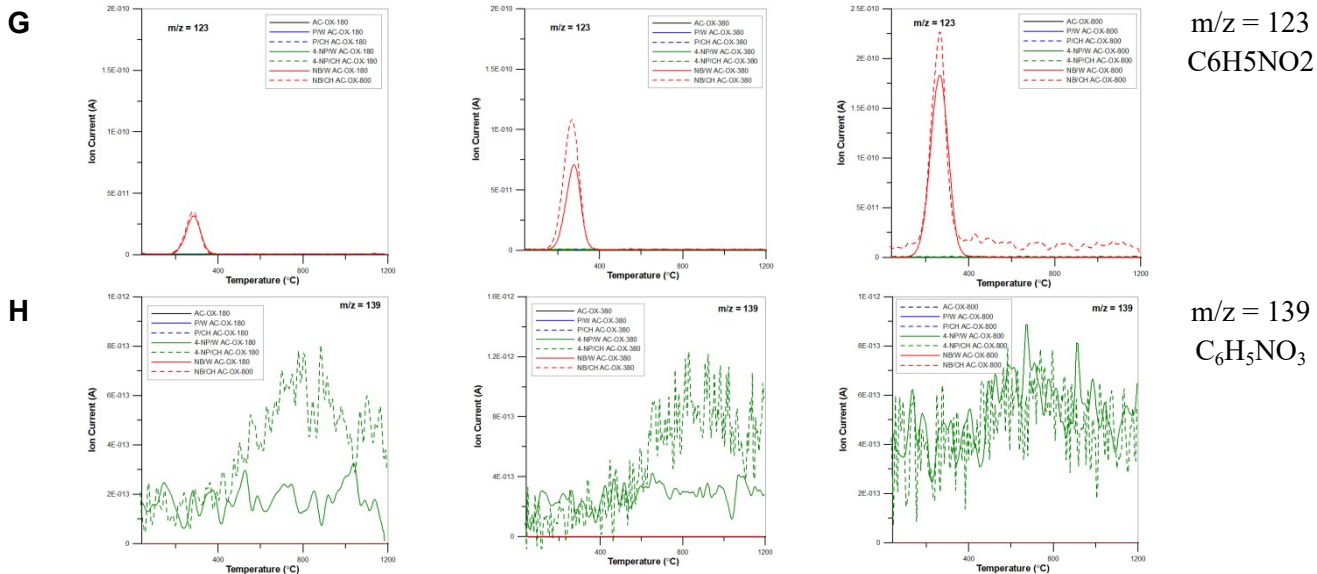

**Figure S5.** MS gaseous profiles registered during the thermal decomposition of AC-OX-180, AC-OX-380, and AC-OX-800 ( $m/z = 17$  (A),  $m/z = 18$  (B),  $m/z = 30$  (C),  $m/z = 44$  (D),  $m/z = 78$  (E),  $m/z = 94$  (F),  $m/z = 123$  (G),  $m/z = 139$  (H)) loaded with P/W and P/CH, 4-NP/W and 4-NP/CH, and NB/W and NB/CH, and modified ACs without solutes as a reference.
